# Supplementary material
Source: publisher site journal article supplement (https://www.dovepress.com/get_supplementary_file.php?f=344923.docx)
Supplement: Supplementary file 1 [file get_supplementary_file.php]

**Supplementary file 1** The questionnaire for this study was designed to investigate the factors influencing physicians’ technology use

**The questionnaire of the mechanism of physicians’ technology use**

**Part 1. Physicians’ technology use**

Notes. There are 6 numbers (0, 1, 2, 3, 4, 5) on the right side of each item, where “0” means “Never”, “1” means “Rarely”, “2” means “Less”, “3” means “General”, “4” means “More”, and “5” means “A lot”. Please tick or circle the number that best fits your real feelings on the item.

| ***Symbolic use*** | | | | | | |
| --- | --- | --- | --- | --- | --- | --- |
| In the past year, I took the initiative to search for information to learn how to use DCP. | 0 | 1 | 2 | 3 | 4 | 5 |
| My understandings of the clinical principle of DCP in the diagnosis of liver cancer. | 0 | 1 | 2 | 3 | 4 | 5 |
| My knowledge about the advantages and disadvantages of DCP in diagnosis of liver cancer. | 0 | 1 | 2 | 3 | 4 | 5 |
| ***Conceptual use*** | | | | | | |
| In the past year, I introduced the use of DCP in the diagnosis of liver cancer to the patients. | 0 | 1 | 2 | 3 | 4 | 5 |
| In the past year, I spread to my colleagues about the DCP’s information in the diagnosis of liver cancer. | 0 | 1 | 2 | 3 | 4 | 5 |
| In the past year, I discussed with the head of the department the conditions and possible times of using DCP. | 0 | 1 | 2 | 3 | 4 | 5 |
| ***Instrumental use*** | | | | | | |
| In the past year, the probability that I use DCP on all working days. | 0 | 1 | 2 | 3 | 4 | 5 |
| In the past year, the probability that I skillfully combine the DCP results to make clinical diagnosis. | 0 | 1 | 2 | 3 | 4 | 5 |
| In the past year, the probability that I recommended further using DCP to my peers. | 0 | 1 | 2 | 3 | 4 | 5 |

**Part 2. Influencing factors of the mechanism of physicians’ technology use**

Notes. There are 5 numbers (1, 2, 3, 4, 5) on the right side of each item, where “1” means “Strongly disagree”, “2” means “Disagree”, “3” means “Neutral”, “4” means “Agree”, and “5” means “Strongly agree”. Please tick or circle the number that best fits your real feelings on the item.

**Aspect: Value cognition**

| ***Behavioural attitudes*** | | | | | |
| --- | --- | --- | --- | --- | --- |
| I think it’s a right thing to use DCP for early diagnosis of liver cancer. | 1 | 2 | 3 | 4 | 5 |
| I think it’s a wise choice to use DCP for early diagnosis of liver cancer. | 1 | 2 | 3 | 4 | 5 |
| I think it’s good for all to use DCP for early diagnosis of liver cancer. | 1 | 2 | 3 | 4 | 5 |
| ***Subjective norms*** | | | | | |
| People who are important to me tend to use DCP for early diagnosis of liver cancer. | 1 | 2 | 3 | 4 | 5 |
| People who are important to me have a positive attitude to use DCP for early diagnosis of liver cancer. | 1 | 2 | 3 | 4 | 5 |
| People who are important to me think it’s a right thing to use DCP for early diagnosis of liver cancer. | 1 | 2 | 3 | 4 | 5 |
| ***Perceived behavioral control*** | | | | | |
| Using DCP can make me have more choice in diagnosing liver cancer. | 1 | 2 | 3 | 4 | 5 |
| Using DCP can increase my confidence in diagnosing liver cancer. | 1 | 2 | 3 | 4 | 5 |
| Using DCP can make my diagnosis more recognized. | 1 | 2 | 3 | 4 | 5 |

**Aspect: Technical assessment**

| ***Perceived ease of use*** | | | | | |
| --- | --- | --- | --- | --- | --- |
| We can easily obtain the materials and instruments needed for DCP test. | 1 | 2 | 3 | 4 | 5 |
| We can get the result of DCP test in a short time after detection. | 1 | 2 | 3 | 4 | 5 |
| We can be provided with assistance in clinical diagnosis by the result of DCP test. | 1 | 2 | 3 | 4 | 5 |
| ***Compatibility*** | | | | | |
| The existing materials and facilities in the hospitals can complete DCP test. | 1 | 2 | 3 | 4 | 5 |
| DCP test is compatible with the serological workflow of diagnosing liver cancer. | 1 | 2 | 3 | 4 | 5 |
| DCP test is consistent with the working experience and habits of traditional blood sampling tests. | 1 | 2 | 3 | 4 | 5 |

**Aspect: Experienced organizational practice**

| ***Support mechanism*** | | | | | |
| --- | --- | --- | --- | --- | --- |
| The hospital provides financial supports for the DCP introduction. | 1 | 2 | 3 | 4 | 5 |
| The hospital equips departments or staff responsible for the technology introduction and application. | 1 | 2 | 3 | 4 | 5 |
| The hospital establishes communication channel for timely feedback in the process of DCP introduction and application. | 1 | 2 | 3 | 4 | 5 |
| ***Practical implementation*** | | | | | |
| The hospital has carried out systematic training and learning on DCP. | 1 | 2 | 3 | 4 | 5 |
| The hospital has disseminated and exchanged information about DCP. | 1 | 2 | 3 | 4 | 5 |
| The hospital has discussed and analyzed the problems in the application of DCP. | 1 | 2 | 3 | 4 | 5 |

**Aspect: Perceived organizational atmosphere**

| ***Organizational culture*** | | | | | |
| --- | --- | --- | --- | --- | --- |
| The hospital advocates the technical innovation to improve the clinical outcomes for patients. | 1 | 2 | 3 | 4 | 5 |
| The hospital advocates continuous learning and absorption of new technologies. | 1 | 2 | 3 | 4 | 5 |
| The hospital advocates the exchange and sharing of clinical experience. | 1 | 2 | 3 | 4 | 5 |
| ***Technology sharing willingness*** | | | | | |
| The hospital is willing to send the information of DCP test with other institutions. | 1 | 2 | 3 | 4 | 5 |
| The hospital is willing to discuss the problems of DCP use with other institutions. | 1 | 2 | 3 | 4 | 5 |
| The hospital is willing to share the experience of DCP use with other institutions. | 1 | 2 | 3 | 4 | 5 |

**Aspect: Perceived environmental pressure**

| DCP has been widely used for early diagnosis of liver cancer in the medical industry. | 1 | 2 | 3 | 4 | 5 |
| --- | --- | --- | --- | --- | --- |
| Many surrounding hospitals are using DCP for early diagnosis of liver cancer. | 1 | 2 | 3 | 4 | 5 |
| Our business partners recommend DCP for early diagnosis of liver cancer. | 1 | 2 | 3 | 4 | 5 |
| The application of DCP in the early diagnosis of liver cancer has become routinized. | 1 | 2 | 3 | 4 | 5 |

**Part 3. Personal information card**

1. Please choose your gender.

A. Male B. Female

2. Please write down your age: ________

3. Please choose your educational level.

A. Junior college or below B. Bachelor C. Master D. Doctor

4. Please choose your professional title.

A. Junior B. Intermediate C. Senior

5. Please choose your administration position.

A. Yes B. No

6. Please choose your years in practice.

A. <5 years B. 5~10 years C. 11~15years D. 16~20 years E. >20 years
